# Supplementary material
Source: Springer Nature journal article supplement (https://www.springermedizin.de/resource/supplementary/12885_2008_1192_MOESM7_ESM.pdf/9471368)

A

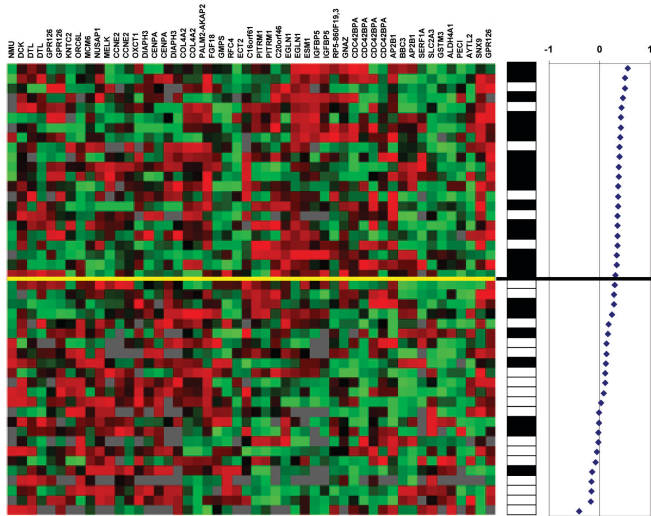

B

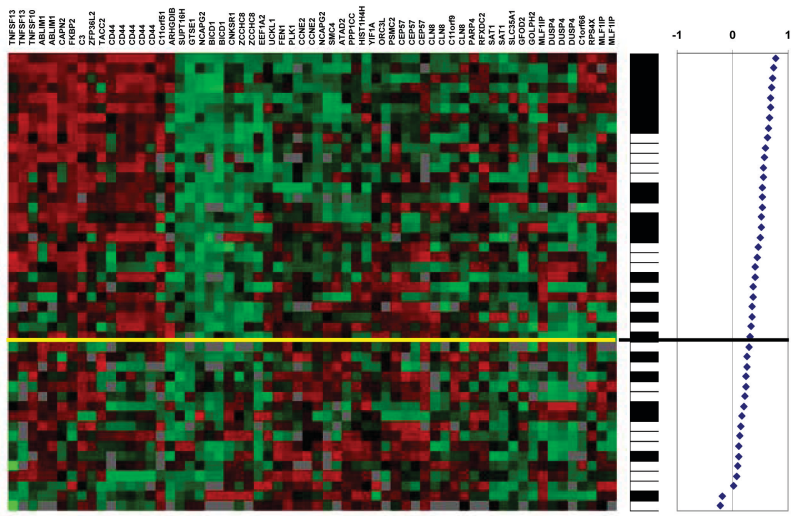

Supplement: MOESM7 [file 9471368]
